# Supplementary material for: Companionship for women/birthing people using antenatal and intrapartum care in England during COVID-19: a mixed-methods analysis of national and organisational responses and perspectives
Source: BMJ Open. 2022 Jan 11;12(1):e051965. doi: 10.1136/bmjopen-2021-051965 (PMC8753093; doi:10.1136/bmjopen-2021-051965)
Supplement: Supplementary data [file bmjopen-2021-051965supp003.pdf]

**Supplementary File 3: Documentary and interview data sources for the six key themes**

| <b>Themes</b>                                         | <b>Documents</b>                                                                                                                                                                                                                                                                                       | <b>Stakeholders</b>                               |
|-------------------------------------------------------|--------------------------------------------------------------------------------------------------------------------------------------------------------------------------------------------------------------------------------------------------------------------------------------------------------|---------------------------------------------------|
| Postcode lottery of care                              | BR_8, BR_12, BR_17, BR_19, BR_18;<br>RCOG/RCM_1e, RCOG_9, RCOG_15,<br>RCM/RCOG_11, RCOG_15, RCOG_17; Sands_1;<br>RCM_5, RCM_7, RCM_31, RCM_38, RCM_39,<br>RCM_41; NHSE_8, NHSE_9, NHSE_11;<br>AIMS_2, AIMS_7, AIMS_8; SoR_2, SoR_4,<br>SoR_5, SoR_6, SoR_7, SoR_8, SoR_9, SoR_10,<br>SoR_11, SoR_12    | 7, 12, 13, 15,<br>17, 18, 20                      |
| Confusion and stress<br>around 'rules'                | BR_8, BR_12, BR_14, BR_16, BR_19; RCM_31;<br>AIMS_7                                                                                                                                                                                                                                                    | 12, 15, 19 20                                     |
| Unintended<br>Consequences                            | BR_1, BR_8, BR_12, BR_16, BR_17, BR_23;<br>RCOG/RCM_1e, RCOG/RCM_1j ,<br>RCOG/RCM_1k, RCOG/RCM_1l; Sands_1;<br>RCM_2, RCM_7, RCM_8, RCM_11, RCM_16 ;<br>NHSE_1, NHSE_2, , NHSE_11; AIMS_8;                                                                                                             | 2, 4, 5, 8, 12,<br>13, 15, 17,<br>18, 19, 20      |
| Need for flexibility                                  | BR_8, BR_6, BR_15, BR_18; Sands_1; RCM_4,<br>RCM_41; NHSE_8; AIMS_2, AIMS_8; SoR_12                                                                                                                                                                                                                    | 3, 7, 10, 13,<br>17, 21                           |
| Acceptable time for<br>support                        | BR_1, BR_6, BR_8, BR_16, BR_17, BR_18,<br>BR_23; RCOG_7; Sands_1; RCM_3, RCM_8,<br>RCM_11, RCM_27, RM_28; AIMS_2, AIMS_5,<br>AIMS_8; SoR_2, SoR_4, SoR_5, SoR_9, SoR_10,<br>SoR_11, SoR_12                                                                                                             | 5, 7, 13, 15,<br>16, 17, 18,<br>19, 20, 21,<br>26 |
| Loss of human rights for<br>gain in infection control | BR_16, BR_17, BR_19, BR_23, BR_8, BR_18;<br>RCOG/RCM_1g , RCOG/RCM_1c,<br>RCOG/RCM_1e, RCOG/RCM_1f , RCOG_9,<br>RCOG_6; RCM_11, RCM_30,<br>RCM_28, RCM_41, RCM_39, RCM_38,<br>RCM_11; NHSE_9, NHSE_10; SoR_2, SoR_6,<br>SoR_5, SoR_8, SoR_7, SoR_4, SoR_9, SoR_10,<br>SoR_11, SoR_12; ISUOG 5, ISUOG_6 | 3, 5, 11, 14,<br>17                               |
